# Supplementary material for: Epigenetic inactivation of VGF associated with Urothelial Cell Carcinoma and its potential as a non-invasive biomarker using urine
Source: PubMed Central journal article supplement (PMC4102814; doi:10.18632/oncotarget.1949), 2014-05-07
Supplement: oncotarget-05-3350-s001.pdf [file oncotarget-05-3350-s001.pdf]

**Epigenetic inactivation of *VGF* associated with Urothelial Cell Carcinoma and its potential as a non-invasive biomarker using urine**

**Supplementary Materials**

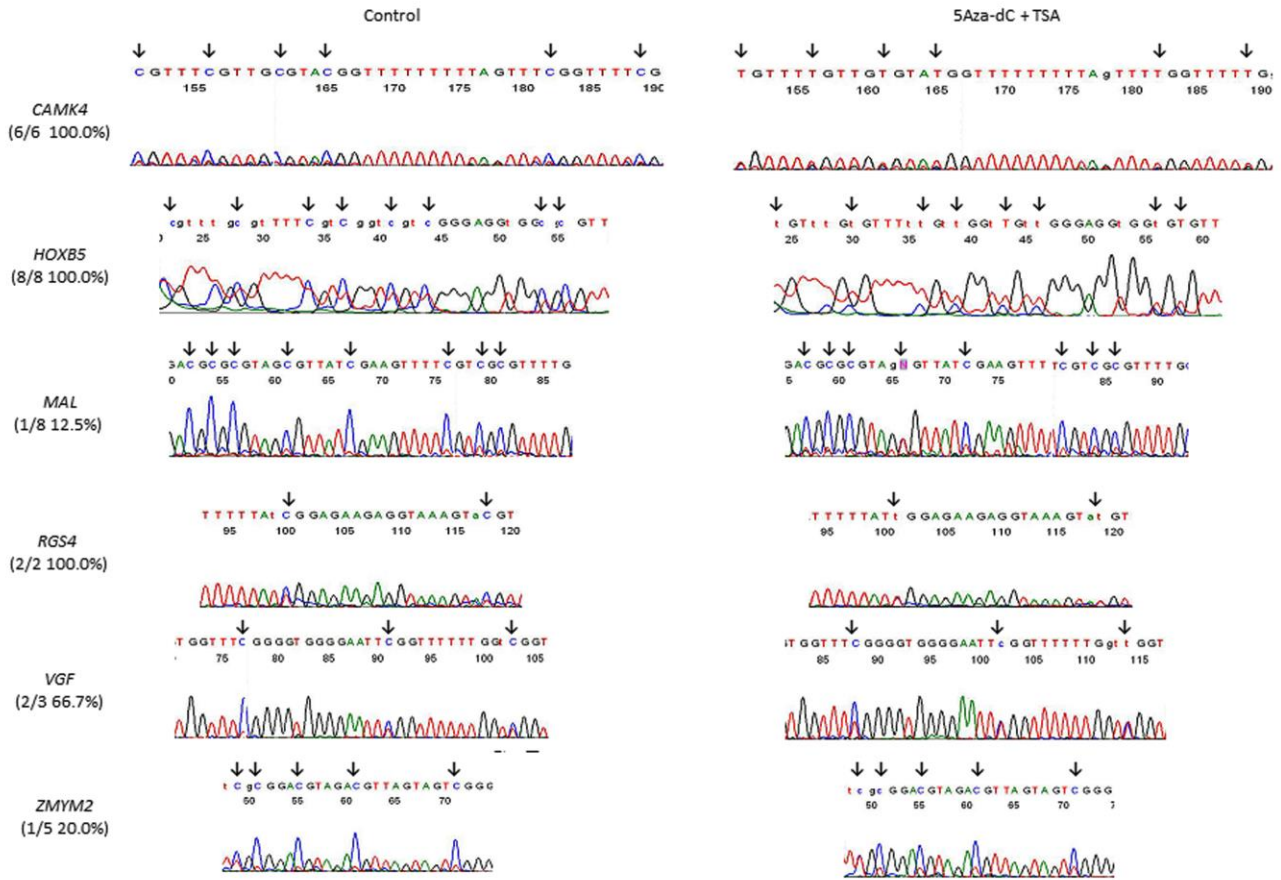

**Supplemental Figure S1:** Representative Electropherograms of direct sequencing of each gene's promoter region (*CAMK4*, *HOXB5*, *MAL*, *VGF* and *ZMYM2*) after bisulfite treatment of respective cancer cell line DNA; Left panel: Methylcytosine (arrows) present after bisulfite treatment in sense strand with vehicle treatment (controls); Right panel: cytosine converted to thymine (arrows) after treatment with 5-Aza-dC +TSA.

**Supplemental Table S1: Primers used for Bisulfite Sequencing**

| RefSeq    | Gene Symbol  | F (5' - 3') (position at promoter)             | R (5' - 3') (position at promoter)             | Amplicon size (Nucleotide range) | Annealing temperature    |
|-----------|--------------|------------------------------------------------|------------------------------------------------|----------------------------------|--------------------------|
| NM_001744 | <i>CAMK4</i> | TTTTGATAGAGGATGGTT<br>GGTTAGT (□441 to □465)   | AAACTTAAAAAAACAC<br>AAAAACCC (□682 to □706)    | 266 bp<br>(□441 to □706)         | Step down<br>56-<br>48°C |
| NM_002147 | <i>HOXB5</i> | GTAGGGAGTTAGTAGGGA<br>GGTAGT (□674 to □697)    | AAATTAACCTTAACCTCT<br>AAACAAAA (□757 to □782)  | 109 bp<br>(□674 to □782)         | Step down<br>56-<br>48°C |
| NM_002371 | <i>MAL</i>   | TTTAATTGGGGTTAGATG<br>TAGGTAG (□1391 to □1415) | AAAAACTTTAAAAAACC<br>AAAAAAA (□1645 to □1669)  | 279 bp<br>(□1391 to □1669)       | Step down<br>56-<br>48°C |
| NM_005613 | <i>RGS4</i>  | TAGAGGGAGATAGAGGA<br>GTTGGTATT (□904 to □929)  | ACAAACCTACAAACCCTT<br>TACACAT (□1125 to □1149) | 246 bp<br>(□904 to □1149)        | Step down<br>56-<br>48°C |
| NM_003378 | <i>VGF</i>   | AAGATTTATTTATTTGTTT<br>TTGT (□330 to □352)     | ACCAATAAAAACTCAAT<br>ACT (□512 to □531)        | 202 bp<br>(□330 to □531)         | Step down<br>56-<br>48°C |
| NM_003453 | <i>ZMYM2</i> | GTTTTTTTTATTTTGGTTG<br>ATGGAG (□10 to □34)     | TAAAAACTTAAAACCCCC<br>TAAAAAC (□196 to □220)   | 211 bp<br>(□10 to □220)          | Step down<br>56-<br>48°C |

**Supplemental Table S2: Primers used for RT-PCR**

| RefSeq    | Gene Symbol  | F (5' - 3') (position at coding sequence) | R (5' - 3') (position at coding sequence) | Amplicon size (Nucleotide range) | Annealing temperature |
|-----------|--------------|-------------------------------------------|-------------------------------------------|----------------------------------|-----------------------|
| NM_001744 | <i>CAMK4</i> | TCCATCGTGATCTCAAA<br>CCA (482 – 501)      | CAGGTCCATAGGCACA<br>ACCT (642 – 661)      | 180 bp<br>(482 – 661)            | 58°C                  |
| NM_002147 | <i>HOXB5</i> | GCAGACTCCGCAAATA<br>TTCC (513 – 532)      | TGTCCTTCTTCCACTTC<br>ATGC (737 – 757)     | 245 bp<br>(513 – 757)            | 59°C                  |
| NM_002371 | <i>MAL</i>   | GGGTGATGTTTCGTGTCT<br>GTG (252 – 272)     | ACACCATCTGGGTTTT<br>CAGC (540 – 559)      | 308 bp<br>(252 – 559)            | 60°C                  |
| NM_005613 | <i>RGS4</i>  | AGTCCCAAGGCCAAAA<br>AGAT (322 – 341)      | GACGGGTTGACCAAAT<br>CAAG (523 – 542)      | 221 bp<br>(322 – 542)            | 59°C                  |
| NM_003378 | <i>VEGF</i>  | GACCCTCCTCTCCACCT<br>CTC (160 – 179)      | ACCGGCTCTTTATGCTC<br>AGA (325 – 345)      | 186 bp<br>(160 – 345)            | 62°C                  |
| NM_003453 | <i>ZMYM2</i> | GGGGAAAACAGAGACA<br>ACCA (2883 – 2902)    | GGTCTGGGCTGTTTCCT<br>CATA (3097 – 3116)   | 234 bp<br>(2883 – 3116)          | 58°C                  |

**Supplemental Table S3: Primers and Probes used for QMSP**

| RefSeq    | Gene Symbol | F (5' - 3') (position at promoter)       | R (5' - 3') (position at promoter)           | Probe (6FAM 5' - 3'TAMRA)                            | Amplicon size (Nucleotide range) | Annealing temperature |
|-----------|-------------|------------------------------------------|----------------------------------------------|------------------------------------------------------|----------------------------------|-----------------------|
| NM_003378 | <i>VEGF</i> | GGATAGCGTTCG<br>TAGGCG<br>(-502 to -483) | AAAAACCGAAT<br>TCCCCACCCCG<br>(-430 to -418) | GCGCCCAAAAAC<br>GACGTAAACCTA<br>AATAC (-465 to -447) | 85 bp (-502 to -418)             | 60.0°C                |

**Supplemental Table S4: Candidate genes with high frequency of methylation in bladder cancer cell lines based on bisulfite sequencing**

| RefSeq           | Gene Symbol   | Gene Name                                      | Locus        | Positive Frequency in cell lines |         |
|------------------|---------------|------------------------------------------------|--------------|----------------------------------|---------|
| NM_001744        | <i>CAMK4</i>  | calcium/calmodulin-dependent protein kinase IV | 5q21.3       | 2/6                              | 33.3 %  |
| NM_020990        | <i>CKMT1b</i> | creatine kinase, mitochondrial 1B              | 15q15        | 3/7                              | 42.9 %  |
| NM_002014        | <i>FKBP4</i>  | FK506 binding protein 4                        | 12p13.33     | 5/7                              | 71.4 %  |
| NM_000403        | <i>GALE</i>   | UDP-galactose-4-epimerase                      | 1p36-p35     | 7/7                              | 100.0 % |
| NM_002147        | <i>HOXB5</i>  | homeobox B5                                    | 17q21.3      | 3/7                              | 42.9 %  |
| NM_002151        | <i>HPN</i>    | hepsin                                         | 19q11-q13.2  | 5/7                              | 71.4 %  |
| NM_000526        | <i>KRT14</i>  | keratin 14                                     | 17q12-q21    | 6/7                              | 85.7 %  |
| NM_004720        | <i>LPAR2</i>  | lysophosphatidic acid receptor 2               | 19p12        | 2/7                              | 28.6 %  |
| NM_002371        | <i>MAL</i>    | T-cell differentiation protein                 | 2cen-q13     | 7/7                              | 100.0 % |
| NM_031858        | <i>NBR1</i>   | neighbor of BRCA1 gene                         | 17q21.31     | 1/6                              | 16.7 %  |
| NM_000266        | <i>NDP</i>    | Norrie disease (pseudoglioma)                  | Xp11.4       | 3/7                              | 42.9 %  |
| NM_000267        | <i>NF1</i>    | neurofibromin 1                                | 17q11.2      | 7/7                              | 100.0 % |
| NM_014476        | <i>PDLIM3</i> | PDZ and LIM domain 3                           | 4q35         | 2/6                              | 33.3 %  |
| NM_000292        | <i>PHKA2</i>  | phosphorylase kinase, $\alpha$ 2               | Xp22.2-p22.1 | 1/6                              | 16.7 %  |
| NM_002855        | <i>PVRL1</i>  | poliovirus receptor-related 1                  | 11q23.3      | 1/6                              | 16.7 %  |
| <b>NM_005613</b> | <i>RGS4</i>   | regulator of G protein signaling 4, isoform 2  | 1q23.3       | 2/6                              | 33.3 %  |
| <b>NM_005627</b> | <i>SGK1</i>   | serum/glucocorticoid regulated kinase 1        | 6q23         | 1/6                              | 16.7 %  |
| <b>NM_003378</b> | <i>VGF</i>    | VGF nerve growth factor inducible              | 7q22         | 4/7                              | 57.1 %  |
| <b>NM_003453</b> | <i>ZMYM2</i>  | zinc finger, MYM-type 2                        | 13q11-q12    | 4/7                              | 57.1 %  |

**Supplemental Table S5: Promoter DNA methylation status of 6 candidate genes in 7 bladder cancer cell lines based on bisulfite sequencing**

| RefSeq    | Gene Symbol  | 5637 | HT-1376 | J82 | SCaBER | SW780 | T24 | UM-UC3 |
|-----------|--------------|------|---------|-----|--------|-------|-----|--------|
| NM_001744 | <i>CAMK4</i> | U    | M       | U   | M/U    | n.a.  | U   | U      |
| NM_002147 | <i>HOXB5</i> | M    | U       | M   | U      | U     | U   | M      |
| NM_002371 | <i>MAL</i>   | M    | M/U     | M/U | M      | M     | M   | M      |
| NM_005613 | <i>RGS4</i>  | M    | U       | M   | U      | n.a.  | U   | U      |
| NM_003378 | <i>VGF</i>   | M    | U       | M   | M      | U     | M   | U      |
| NM_003453 | <i>ZMYM2</i> | U    | M       | U   | U      | M     | M   | M      |

M: methylated, U: unmethylated, M/U: both methylated and unmethylated, n.a.: not assessed

**Supplemental Table S 6: Clinicopathological characteristics of tested urine samples of bladder cancer patients**

| Sample number | Cytology | Cystoscopy | Tumor depth | Tumor grade | VGF QMSP |
|---------------|----------|------------|-------------|-------------|----------|
| 307           | n.a.     | n.a.       | n.a.        | n.a.        | Positive |
| 308           | n.a.     | n.a.       | n.a.        | n.a.        | Positive |
| 309           | n.a.     | n.a.       | n.a.        | n.a.        | Positive |
| 314           | Positive | Positive   | NMIBC       | Low grade   | Negative |
| 316           | Positive | Positive   | NMIBC       | Low grade   | Negative |
| 317           | Positive | Positive   | MIBC        | Low grade   | Positive |
| 320           | Positive | Negative   | NMIBC       | Low grade   | Negative |
| 322           | Negative | Positive   | MIBC        | Low grade   | Negative |
| 323           | Positive | n.a.       | MIBC        | Low grade   | Positive |
| 324           | Negative | Negative   | MIBC        | Low grade   | Negative |
| 325           | n.a.     | n.a.       | n.a.        | n.a.        | Positive |
| 326           | Negative | Negative   | n.a.        | n.a.        | Negative |
| 327           | n.a.     | n.a.       | n.a.        | n.a.        | Negative |
| 328           | n.a.     | n.a.       | n.a.        | n.a.        | Negative |
| 329           | n.a.     | Positive   | NMIBC       | High grade  | Positive |

|            |          |          |       |           |          |
|------------|----------|----------|-------|-----------|----------|
| 330        | Positive | Positive | MIBC  | Low grade | Negative |
| <b>331</b> | n.a.     | n.a.     | n.a.  | n.a.      | Negative |
| <b>332</b> | Positive | n.a.     | NMIBC | Low grade | Positive |
| <b>333</b> | Positive | Negative | MIBC  | Low grade | Negative |
| <b>335</b> | n.a.     | Positive | MIBC  | Low grade | Negative |

MIBC: muscle invasive bladder cancer, NMIBC: non muscle invasive bladder cancer, n.a.: no information available
